# Supplementary material for: Promoter chromatin remodeling of immediate-early genes is mediated through H3 phosphorylation at either serine 28 or 10 by the MSK1 multi-protein complex
Source: PubMed Central journal article supplement — Nucleic Acids Res. 2010 Feb 3;38(10):3196–208. doi: 10.1093/nar/gkq030 (PMC2879512; doi:10.1093/nar/gkq030), 2010-02-03
Supplement: gkq030_1.pdf [file gkq030_1.pdf]

Table S1: Primer sequences used to amplify ChIP DNA and cDNA

|                   |                                 |                     |                                 |                      |                                 |
|-------------------|---------------------------------|---------------------|---------------------------------|----------------------|---------------------------------|
| <b>Jun (-711)</b> | <b>Primer Sequence 5' to 3'</b> | <b>Cox-2 (-493)</b> | <b>Primer Sequence 5' to 3'</b> | <b>Fosl1 (-1113)</b> | <b>Primer Sequence 5' to 3'</b> |
| Forward           | CGCAGCGGAGCATTACCTCA            | Forward             | AAATTAACCGGTAGCTGTGTG           | Forward              | TCACCAAGACTCAGCCAATTAC          |
| Reverse           | CCATTGGCTTGCCTCGTTCTC           | Reverse             | CCGGGATCTAAGGTCCTAA             | Reverse              | GCCATCATAACCCCACT               |
| <b>Jun (-146)</b> |                                 | <b>Cox-2 (-111)</b> |                                 | <b>Fosl1 (-187)</b>  |                                 |
| Forward           | TTACCTCATCCCGTGAGCCTT           | Forward             | AAGCCTAAGCGGAAAGACAGA           | Forward              | CCCCGTGGTGCAAGTGGTT             |
| Reverse           | CCATTGGCTTGCCTCGTT              | Reverse             | GGCTGCTAATGGGGAGAAC             | Reverse              | TGGCGGCTGCGGTTCTGACT            |
| <b>Jun (129)</b>  |                                 | <b>Cox-2 (903)</b>  |                                 | <b>Fosl1 (989)</b>   |                                 |
| Forward           | GGACTGTTTCATCCGTTTGTCT          | Forward             | AAACCGTGGGGAATGTATGAG           | Forward              | ACACTCGCGCTCCACATTCTC           |
| Reverse           | CAAATGCTCCCAAATACC              | Reverse             | CCAGTCCGGGTACAGTACA             | Reverse              | CGCAGCTCCTCCCTCCC               |
| <b>Jun (1115)</b> |                                 | <b>Cox-2 (1982)</b> |                                 | <b>Fosl1 (2249)</b>  |                                 |
| Forward           | CCAAGAAGCTCGGACCTTCTCA          | Forward             | GCCTTCTCCAACCTCTCTAC            | Forward              | CCTATCCCAGTACAGTCCC             |
| Reverse           | GGTGATGTGCCATTGCT               | Reverse             | ACTCACCTTCACACCCA               | Reverse              | ATCGCTGTTTCTTACCTGCTC           |
| <b>Jun (2953)</b> |                                 | <b>Cox-2 (4255)</b> |                                 | <b>Fosl1 (7676)</b>  |                                 |
| Forward           | TGGTTGAAAGCTGTATGAAGT           | Forward             | GACCCAGAGCTCCTTTTCAAC           | Forward              | CAAGGGTAAGGGTGTGTC              |
| Reverse           | GGGTCCTGCTTTGAGA                | Reverse             | GGGGGTGCCAGTGATAGAGT            | Reverse              | TCTAGAGCTGGCCTATCATAA           |
|                   |                                 |                     |                                 |                      |                                 |
| <b>GAPDH</b>      | <b>Primer Sequence 5' to 3'</b> |                     |                                 |                      |                                 |
| Forward           | TTCCGTGTTCTACCCCAATGTGT         |                     |                                 |                      |                                 |
| Reverse           | GGAGTTGCTGTTGAAGTCGCAGGAG       |                     |                                 |                      |                                 |

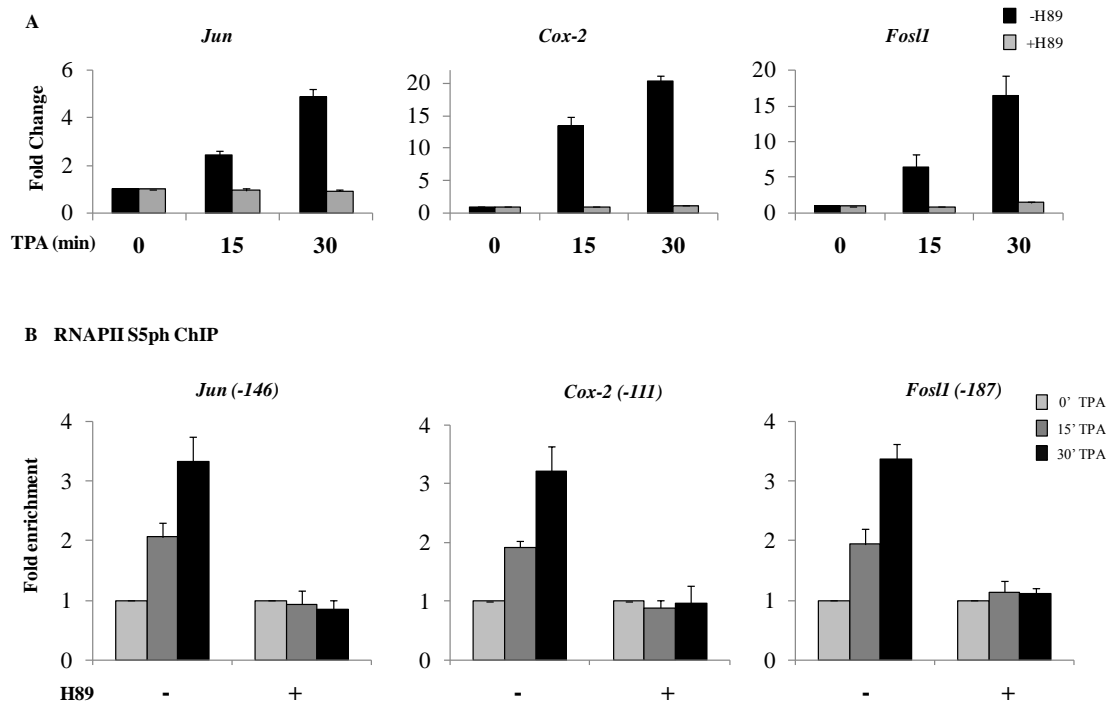

**Figure S1.** Inhibition of TPA-induced transcription initiation of the *Jun*, *Cox-2* and *FosII* genes by H89. Serum-starved 10T1/2 cells were pre-treated or not with H89 prior to TPA stimulation for 0, 15 or 30 min. (A) Total RNA was isolated and quantified by real time RT-PCR. Fold change values, normalized to GAPDH levels in untreated and treated samples and to time 0 values, are the mean of three independent experiments, and the error bars represent the standard deviation. (B) Formaldehyde crosslinked mononucleosomes were prepared and used in ChIP assays with anti-RNAPII S5ph antibodies. Equal amounts of input and immunoprecipitated DNAs were quantified by real-time quantitative PCR. The enrichment values of the 5' proximal sequences of *Jun* (-146), *Cox-2* (-111) and *FosII* (-187) genes are the mean of three independent experiments, and the error bars represent the standard deviation.

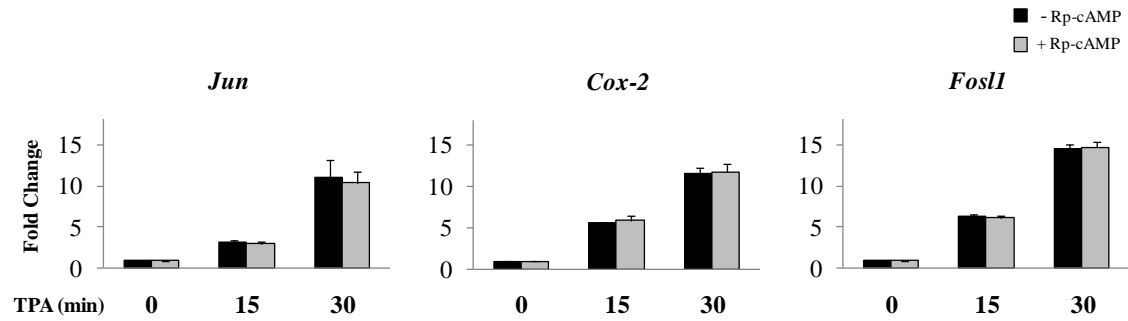

**Figure S2.** No inhibition of TPA-induced transcription initiation of the *Jun*, *Cox-2* and *FosII* genes by Rp-cAMP. Serum-starved 10T1/2 cells were pre-treated or not with Rp-cAMP prior to TPA stimulation for 0, 15 or 30 min. Total RNA was isolated and quantified by real time RT-PCR. Fold change values, normalized to time 0 values, are the mean of three independent experiments, and the error bars represent the standard deviation.

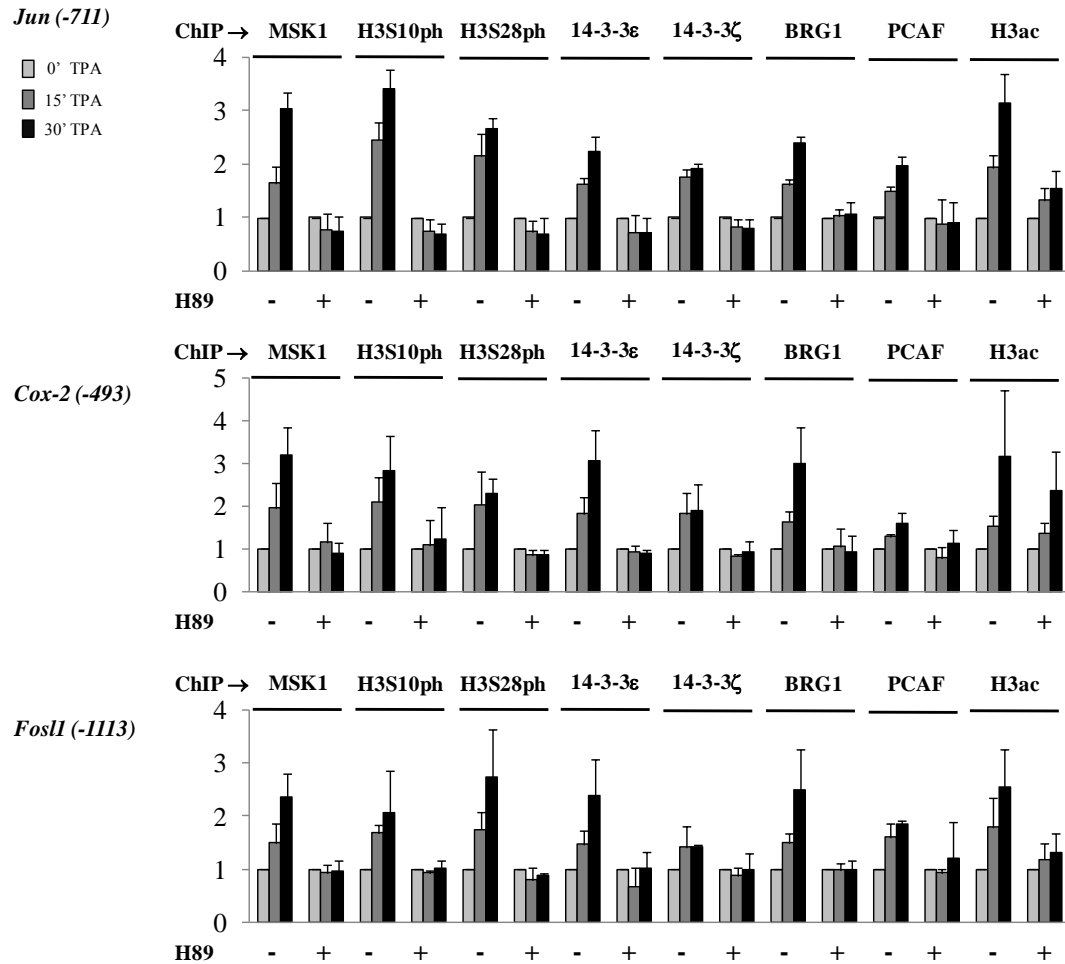

**Figure S3.** Inhibition by H89 of TPA-induced nucleosomal response and chromatin remodeler/modifier recruitment to the *Jun*, *Cox-2* and *FosII* 5' distal regulatory regions. Serum-starved 10T1/2 cells were pre-treated or not with H89 prior to TPA stimulation for 0, 15 or 30 min. Formaldehyde crosslinked mononucleosomes were prepared and used in ChIP assays with antibodies against MSK1, H3S10ph, H3S28ph, 14-3-3ε, 14-3-3ζ, BRG1, PCAF or H3K9acK14ac. Equal amounts of input and immunoprecipitated DNAs were quantified by real-time quantitative PCR. The enrichment values of the 5' distal sequences of *Jun* (-711), *Cox-2* (-493) and *FosII* (-1113) genes are the mean of three independent experiments, and the error bars represent the standard deviation.

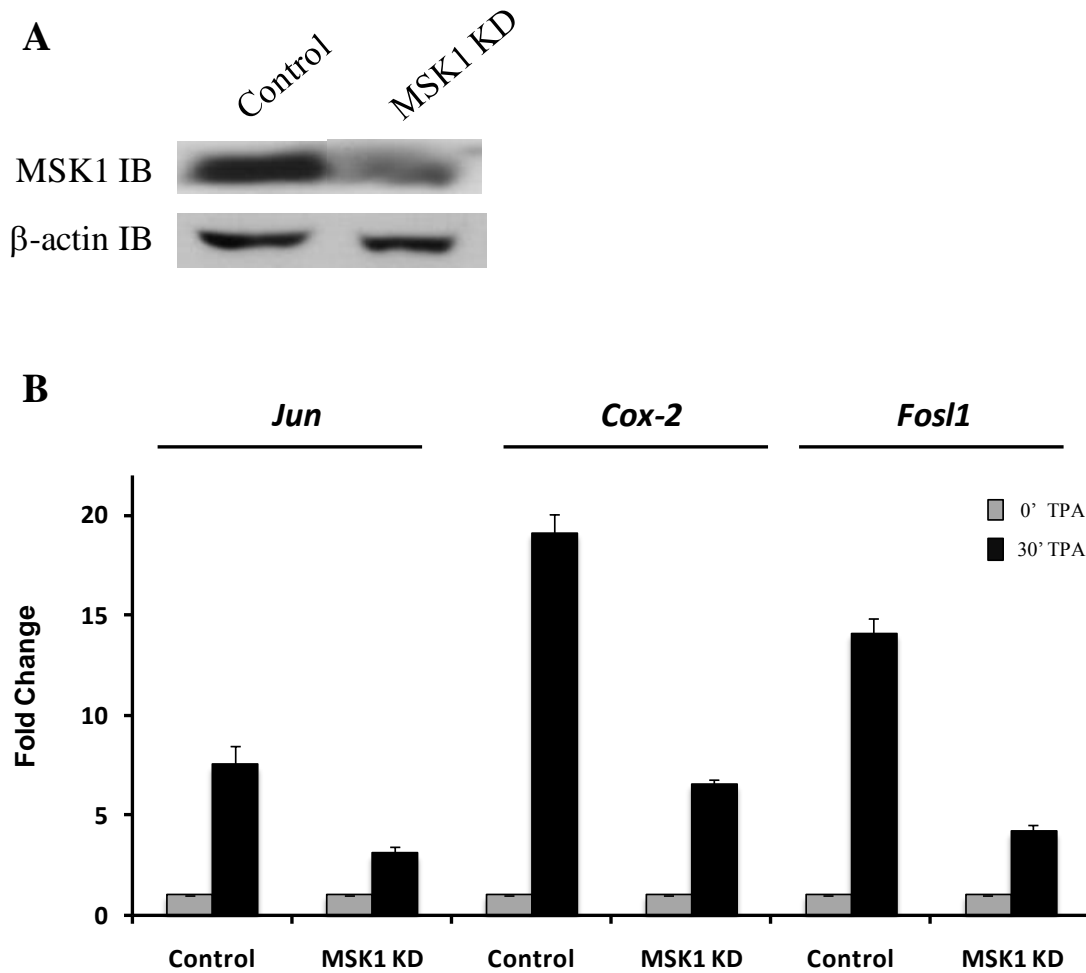

**Figure S4.** Reduced TPA-induced transcription initiation of the *Jun*, *Cox-2* and *Fos11* genes in MSK1 knockdown 10T1/2 cells. (A) Aliquots of 1 mg total cell extracts from control and MSK1 knockdown 10T1/2 cells were incubated with anti-MSK1 antibodies. Immunoprecipitated proteins were resolved on SDS-10%-PAGE and immunoblotted with indicated antibodies (IB). (B) Quiescent control and MSK1 knockdown 10T1/2 cells were TPA-stimulated for 0 or 30 min. Total RNA was isolated and quantified by real time RT-PCR. Fold change values, normalized to GAPDH levels and to time 0 values, are the mean of three independent experiments, and the error bars represent the standard deviation.
